# Supplementary material for: Patients poorly recognize lesions of concern that are malignant melanomas: is self-screening the correct advice?
Source: PeerJ. 2024 Jul 3;12:e17674. doi: 10.7717/peerj.17674 (PMC11227272; doi:10.7717/peerj.17674)
Supplement: Supplemental Information 1 [file peerj-12-17674-s001.xlsx]

## Sheet: Sheet1
Gender 1male,2 female	Age	Fam_Hx_Mel 1Y/0n	Prev_Hx_Mel1Y/02n	Patient_Aware1Y/0n	AI_Score	MIS_or_Invasive	Location 1ab,2 lowleg,3back,4shoulder,5arm,6chest,7upleg, 8ear,9head/scalp,10heelfoot, aaface, 12neck, 13pelvis	Size_Lesion	VAR00005	Les_of_Concern_Aware	HistoPath_1_POSITIVE_2_NEGATIVE
1	70	0	0	0	0.05	2	1	8.56		0	1
1	52	0	0	0	0.05	0	2	18		0	2
1	52	0	0	0	0.05	0	3	42		0	2
1	71	0	1	0	0.05	1	3	100		0	1
2	33	1	0	1	0.05	0	3	120		1	2
2	33	1	0	1	0.05	0	2	12		1	2
1	39	0	1	1	0.05	2	4	29.37		1	1
1	59	1	1	0	0.05	0	1	13.4		0	2
1	63	1	0	0	0.05	2	5	90		0	1
2	36	1	0	0	0.05	0	5	6.57		0	2
2	36	1	0	0	0.05	0	1	7.11		0	2
1	38	1	1	0	0.05	0	3	21.63		0	2
1	38	1	1	0	0.05	0	6	4.06		0	2
1	38	1	1	0	0.05	0	5	13.54		0	2
1	30	0	0	0	0.05	0	3	5.5		0	2
1	39	0	1	0	0.05	0	3	5.02		0	2
2	56	0	0	0	0.06	1	3	4.04		0	1
1	79	0	0	1	0.06	1	7	28.09		1	1
1	79	0	0	0	0.06	1	2	25		0	1
1	79	0	0	0	0.06	0	6	19.28		0	2
2	38	1	0	1	0.06	0	2	5.14		1	2
1	59	0	0	0	0.06	0	3	20.12		0	2
1	49	0	0	0	0.06	0	6	7.19		0	2
1	68	0	0	0	0.06	0	7	9		0	2
2	63	1	0	1	0.07	2	1	36.19		1	1
2	29	0	1	0	0.07	1	2	5.68		0	1
1	29	0	0	0	0.07	0	3	16.95		0	2
2	68	0	0	1	0.08	0	7	2.63		1	2
1	53	1	0	0	0.08	2	3	3.25		0	1
1	65	0	0	0	0.08	1	4	19.84		0	1
1	63	0	0	0	0.08	0	2	1.76		0	2
1	52	0	0	0	0.1	0	3	5.88		0	2
2	38	1	0	0	0.1	2	3	7.66		0	1
1	44	1	1	0	0.1	0	7	2.24		0	2
2	44	0	0	0	0.1	0	9	3.54		0	2
2	29	0	1	0	0.1	0	1	5.65		0	2
1	53	0	0	0	0.1	0	3	42		0	2
1	60	1	1	0	0.1	0	3	7.43		0	2
1	50	0	0	1	0.1	0	10	6.37		1	2
2	29	0	0	0	0.1	0	3	9.11		0	2
1	53	1	0	1	0.1	0	9	19.46		1	2
1	72	0	0	0	0.1	0	7	9.29		0	2
2	57	0	0	1	0.11	1	3	23.81		1	1
2	57	0	0	0	0.11	0	3	37.34		0	2
1	41	1	0	0	0.11	1	3	25.07		0	1
2	53	0	0	0	0.11	1	2	2.81		0	1
2	25	1	0	0	0.11	0	3	29.88		0	2
2	78	0	0	0	0.11	0	11	16.87		0	2
1	56	0	0	0	0.11	1	6	18.71		0	1
1	47	0	0	0	0.11	0	10	2.09		0	2
1	65	0	0	0	0.12	0	7	4.42		0	2
2	55	1	0	0	0.12	0	7	12.69		0	2
1	46	0	0	0	0.12	1	3	12.93		0	1
1	62	0	1	0	0.12	1	3	21.47		0	1
1	62	0	1	0	0.12	0	6	28.58		0	2
1	62	0	1	0	0.12	1	12	22.27		0	1
2	43	1	0	0	0.12	0	6	2.39		0	2
2	68	0	1	0	0.12	0	7	13.95		0	2
2	36	1	1	1	0.13		4			1	1
2	63	0	0	1	0.13	1	2	6.27		1	1
1	61	0	0	1	0.13	1	11	27.69		1	1
2	38	1	0	0	0.13	0	1	16		0	2
1	43	1	0	1	0.14	2	3	27.97		1	1
2	50	0	0	0	0.14	0	3	4.52		0	2
2	73	0	0	1	0.15	1	5	24.15		1	1
2	65	0	0	0	0.15	0	3	4.74		0	2
1	54	1	0	0	0.15	0	3	19.46		0	2
2	71	0	0	0	0.15	0	3	15.29		0	2
1	33	0	0	0	0.15	0	5	6.37		0	2
1	23	0	0	1	0.15	2	12	9.78		1	1
1	49	0	0	0	0.15	1	2	10.13		0	1
1	48	1	0	0	0.15	1	3	20.72		0	1
2	61	1	1	0	0.15	0	3	6.25		0	2
2	59	0	1	0	0.15	0	7	2.5		0	2
1	58	1	1	0	0.16	1	3	17.07		0	1
1	83	0	0	0	0.16	2	5	17.81		0	1
2	43	1	1	0	0.17	0	6	4.52		0	2
1	88	0	0	0	0.17	0	8	41.23		0	2
1	69	0	0	0	0.17	0	12	27.71		0	2
1	69	0	0	0	0.17	0	3	27.74		0	2
1	54	0	0	0	0.18	0	3	10.09		0	2
2	68	0	0	0	0.18	1	2	9.83		0	1
1	49	0	1	0	0.18	0	7	23.62		0	2
1	49	0	1	0	0.18	2	4	11.85		0	1
2	60	0	0	0	0.19	1	3	11.56		0	1
1	27	0	0	0	0.19	1	1	26.83		0	1
2	50	1	0	0	0.19	1	3	12.4		0	1
1	61	1	0	0	0.19	2	3	14.93		0	1
1	69	0	0	0	0.2	1	6	23.25		0	1
1	69	0	0	0	0.2	0	9	23.97		0	2
2	68	0	1	0	0.2	1	3	10.14		0	1
2	36	1	0	0	0.21	0	6	24.28		0	2
2	66	0	0	0	0.21	0	3	10.03		0	2
2	75	0	0	0	0.22	0	2	11.09		0	2
2	31	0	0	0	0.22	0	7	7.36		0	2
2	52	1	0	0	0.23	0	1	17.38		0	2
1	50	0	0	0	0.23	1	12	37.37		0	1
2	63	0	1	0	0.25	0	7	3.85		0	2
2	63	0	1	0	0.25	0	3	5.43		0	2
2	39	0	0	1	0.26	0	5	9.16		1	2
2	38	1	0	0	0.26	0	10	5.84		0	2
1	36	1	0	0	0.26	0	3	5.5		0	2
2	75	0	0	0	0.26	0	2	15.29		0	2
1	61	0	0	0	0.28	1	4	35.36		0	1
1	54	0	0	0	0.28	0	6	13.83		0	2
1	68	0	0	0	0.28	1	6	12.66		0	1
2	59	0	0	0	0.28	0	3	10.83		0	2
1	76	0	1	0	0.28	0	4	15.24		0	2
1	56	1	0	0	0.28	0	3	18.01		0	2
2	73	0	0	0	0.29	0	3	11.18		0	2
1	68	0	0	0	0.29	1	11	12.95		0	1
1	68	0	0	0	0.3	0	3	22.82		0	2
2	48	0	0	0	0.31	0	3	6.7		0	2
2	88	0	0	0	0.31	0	5	34.66		0	2
1	38	0	0	0	0.32	1	6	2.47		0	1
1	48	0	0	0	0.32	0	3	9.94		0	2
2	65	1	1	0	0.33	0	3	5.63		0	2
2	42	1	1	0	0.33	0	2	2.18		0	2
2	50	1	1	0	0.33	2	7	17.56		0	1
1	36	0	0	0	0.33	0	3	3.69		0	2
1	61	1	1	1	0.34	0	3	12.59		1	2
1	69	0	0	1	0.35	0	9	23.97		1	2
1	69	0	0	1	0.35	1	6	23.25		1	1
1	57	0	0	0	0.36	1	12	17.39		0	1
1	45	0	0	0	0.36	0	3	8.38		0	2
2	37	0	0	0	0.36	1	7	2.94		0	1
1	56	1	1	0	0.37	1	11	29.8		0	1
1	35	0	0	0	0.39	0	8	32.12		0	2
2	64	0	0	0	0.39	0	13	4.09		0	2
2	60	0	0	0	0.39	0	3	9.99		0	2
2	34	0	0	1	0.4	0	4	2.93		1	2
2	34	0	0	0	0.4	0	1	2.26		0	2
2	50	1	1	0	0.44	1	1	24.89		0	1
1	25	0	0	0	0.46	0	4	2.9		0	2
1	45	1	1	1	0.46	0	3	2.68		1	2
1	58	1	1	1	0.46	1	3	16.47		1	1
2	65	0	0	0	0.47	2	2	7.54		0	1
2	72	1	1	0	0.47	2	7	15.03		0	1
1	64	1	1	0	0.5	0	6	18.58		0	2
1	64	1	1	0	0.51	0	3	8.8		0	2
2	68	0	0	0	0.54	0	3	11.09		0	2
2	68	0	0	0	0.55	0	3	13.05		0	2
1	68	0	0	0	0.59	0	3	13.71		0	2
1	73	1	1	0	0.6	1	4	13.72		0	1
1	73	1	1	0	0.6	1	3	19.43		0	1
1	66	0	0	0	0.6	1	3	18.28		0	1
1	66	0	0	0	0.6	1	12	15.66		0	1
1	54	0	0	1	0.63	1	3	10.68		1	1
2	64	1	1	1	0.65	1	3	14.23		1	1
2	64	1	1	1	0.68	2	3	14		1	1
1	32	0	0	0	0.7	0	11	13.71		0	2
1	32	0	0	0	0.7	0	12	5.79		0	2
2	66	0	0	0	0.7	1	6	19.87		0	1
1	42	1	1	1	0.72	0	3	11.1		1	2
1	34	0	0	0	0.72	0	6	2.26		0	2
2	43	1	1	0	0.72	0	3	19.32		0	2
2	61	0	0	0	0.74	0	7	27.1		0	2
1	56	0	0	0	0.75	0	6	4.82		0	2
1	56	0	0	0	0.75	1	8	34.28		0	1
1	54	1	1	1	0.76	0	3	3.03		1	2
1	63	1	1	0	0.77	1	3	10.38		0	1
1	48	1	1	0	0.79	1	3	29.34		0	1
1	47	1	1	1	0.8	1	3	21.01		1	1
1	47	1	1	1	0.8	0	4	7.56		1	2
1	47	1	1	1	0.8	0	4	7.76		1	2
1	47	1	1	1	0.8	0	4	3.62		1	2
1	49	0	0	0	0.81	0	7	1.53		0	2
2	65	0	0	0	0.81	0	3	14.8		0	2
1	62	0	0	0	0.81	0	10	4.18		0	2
1	61	0	0	1	0.81	1	7	21.43		1	1
2	54	0	0	0	0.81	2	2	28.82		0	1
2	70	0	0	0	0.82	2	7	13.92		0	1
1	63			0	0.82	1	6	85.2		0	1
1	53			0	0.82	0	3	14.09		0	2
2	50			0	0.82	0	3	3.15		0	2
2	64			1	0.82	0	5	50.55		1	2
1	61			0	0.82	2	2	75.39		0	1
1	28			0	0.82	0	3	2.04		0	2
2	30			0	0.83	0	1	0.73		0	2
1	49			0	0.83	0	2	6.88		0	2
2	52			0	0.83	1	5	13.63		0	1
1	69			0	0.83	2	6	64.95		0	1
2	58			0	0.83	1	5	70.22		0	1
1	55			0	0.83	0	5	21.62		0	2
1	67			0	0.83	0	3	69.83		0	2
1	80			0	0.83	0	5	8.32		0	2
1	74			0	0.83	2	5	20.44		0	1
2	32			0	0.84	0	7	3.85		0	2
1	73			0	0.85	0	3	4.76		0	2
1	65			0	0.85	0	7	13.6		0	2
1	53			0	0.86	0	4	15.16		0	2
1	80			0	0.86	0	2	46.1		0	2
2	56			0	0.87	0	2	46.75		0	2
2	64			0	0.87	1	5	6.38		0	1
1	67			0	0.87	0	3	60.5		0	2
1	70			0	0.87	0	3	23.64		0	2
2	60			0	0.87	0	3	4.33		0	2
1	34			1	0.87	0	6	13.4		1	2
1	68			0	0.87	1	3	64.73		0	1
2	62			0	0.87	0	5	7.56		0	2
2	38			0	0.87	0	3	1.94		0	2
1	66			0	0.88	2	3	8.74		0	1
2	36			0	0.88	0	5	5.19		0	2
2	64			0	0.88	0	6	22.84		0	2
1	79			0	0.88	0	5	24.62		0	2
1	49			0	0.88	0	3	9.74		0	2
2	81			0	0.88	0	5	72		0	2
1	33			0	0.88	0	7	7.42		0	2
1	86			0	0.89	0	5	13.93		0	2
1	57			0	0.89	0	4	1.17		0	2
2	51			1	0.9	0	3	7.58		1	2
2	42			1	0.9	0	4	6.66		1	2
1	79			0	0.9	0	5	58.61		0	2
2	58			0	0.9	0	5	2.37		0	2
1	80			0	0.9	1	8	17.85		0	1
1	36			1	0.9	0	3	13.44		1	2
1	51			0	0.9	0	3	5.63		0	2
2	28			1	0.9	0	5	0.82		1	2
2	28			1	0.9	0	3	7.38		1	2
2	51			1	0.91	0	7	8.11		1	2
1	66			0	0.91	0	3	14.31		0	2
2	38			1	0.91	0	5	13		1	2
2	48			0	0.91	0	1	1.86		0	2
2	67			0	0.91	0	1	23.35		0	2
2	31			0	0.92	0	5	1.35		0	2
2	32			0	0.92	1	2	32.08		0	1
1	61			0	0.92	0	7	28.58		0	2
1	55			0	0.92	1	2	7.85		0	1
1	56			0	0.92	1	3	94.58		0	1
2	56			0	0.92	0	2	1.23		0	2
2	68			0	0.92	0	3	5.05		0	2
1	33			0	0.93	0	3	10.65		0	2
2	72			0	0.93	0	3	11.17		0	2
2	60			0	0.93	0	2	22.53		0	2
1	52			0	0.93	0	5	5.45		0	2
2	65			0	0.93	0	7	19.32		0	2
2	66			0	0.93	0	1	24.27		0	2
2	39			0	0.93	0	5	2.93		0	2
2	39			0	0.94	0	5	10.95		0	2
1	19			0	0.94	0	12	7.48		0	2
2	45			1	0.94	0	2	1.79		1	2
2	65			1	0.94	0	5	91.44		1	2
2	32			1	0.94	0	5	3.33		1	2
1	68			0	0.95	0	7	8.47		0	2
2				0	0.95		2	83.95		0	2
2	21			1	0.95	0	9	42.17		1	2
2	53			1	0.95	0	12	9.2		1	2
2	53			0	0.95	0	3	11.49		0	2
2	13			0	0.95	0	3	2.65		0	2
2	19			0	0.95	0	10	2.41		0	2
2	62			0	0.95	1	5	26.92		0	1
1	63			1	0.95	2	5	47.17		1	1
1	24			0	0.95	0	2	2.13		0	2
2	43			0	0.95	0	3	41.04		0	2
2	72			0	0.95	0	2	8.18		0	2
1	39			0	0.95	0	5	12		0	2
2	48			0	0.95	0	9	8		0	2
1	31			1	0.95	0	5	3		1	2
1	77			0	0.95	1	3	14		0	1
2	43			1	0.95	1	3	39		1	1
